# Supplementary material for: Synthesis of zinc oxide nanoparticles with strong, tunable and stable visible light emission by solid-state transformation of Zn(ii)–organic coordination polymers
Source: Royal Society of Chemistry journal article supplement (doi:10.1039/c1jm10809c), 2011-01-01
Supplement: c1jm10809c.pdf [file c1jm10809c.pdf]

## Supplementary Information

### *Synthesis of zinc oxide nanoparticles with strong, tunable and stable visible light emission by solid-state transformation of Zn(II)-organic coordination polymers*

Hong-Yan Shi, Bin Deng,\* Sheng-Liang Zhong,\* Lei Wang, An-Wu Xu\*

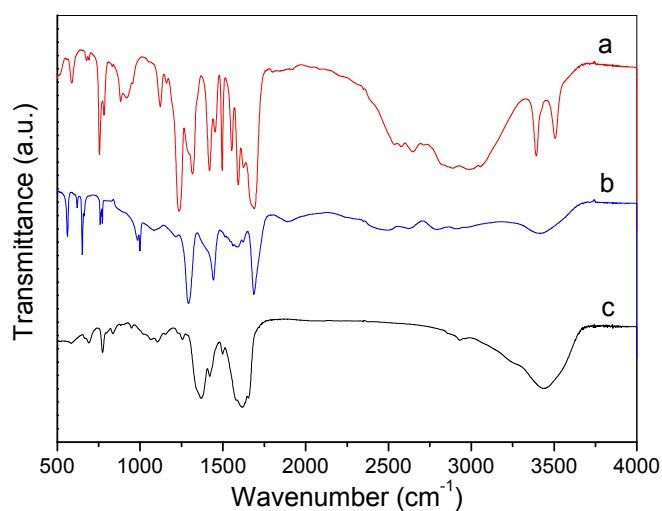

**Fig. S1** IR spectra of ligand A (a), ligand B (b) and precursor-1 (c).

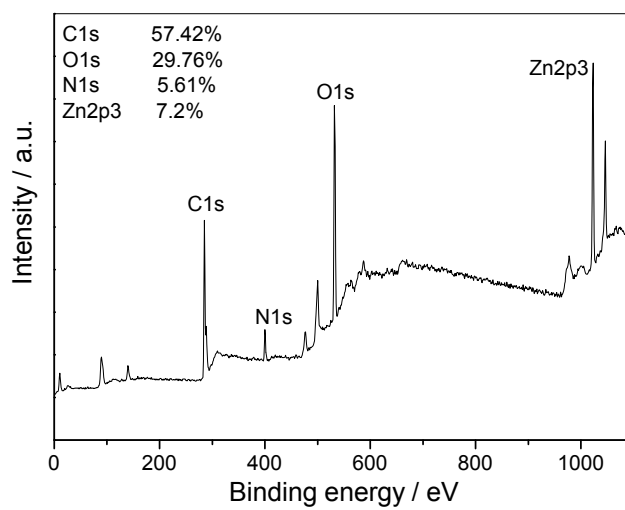

**Fig. S2** XPS spectrum of precursor-1.

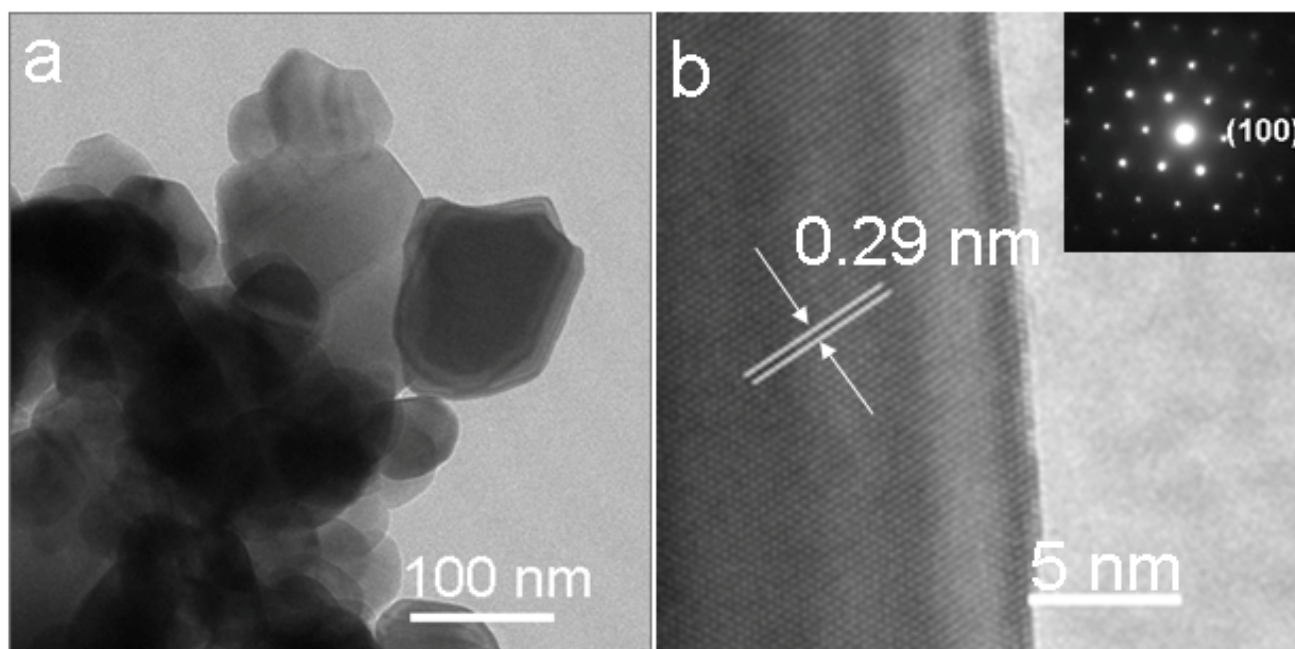

**Fig. S3** (a) TEM and (b) HRTEM image of ZnO-1 nanoparticles. The inset is the corresponding SAED pattern.

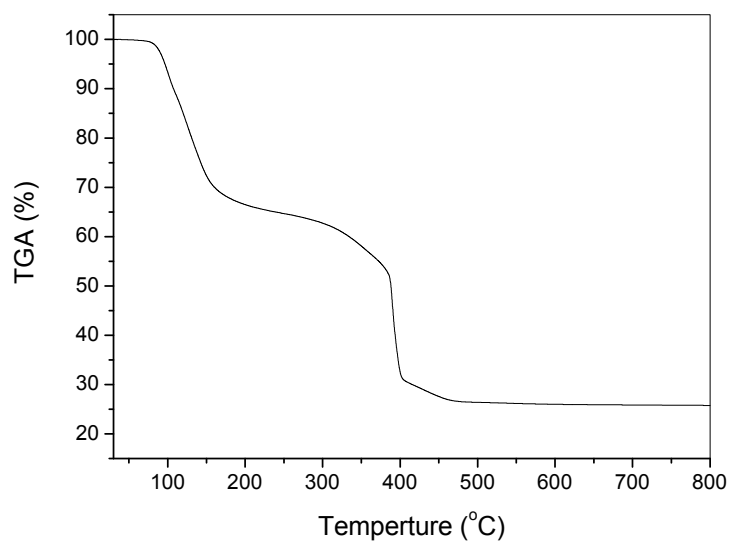

**Fig. S4** TGA curve of coordination polymer of precursor-1 showing its decomposition and transformation to zinc oxide at 550 °C.

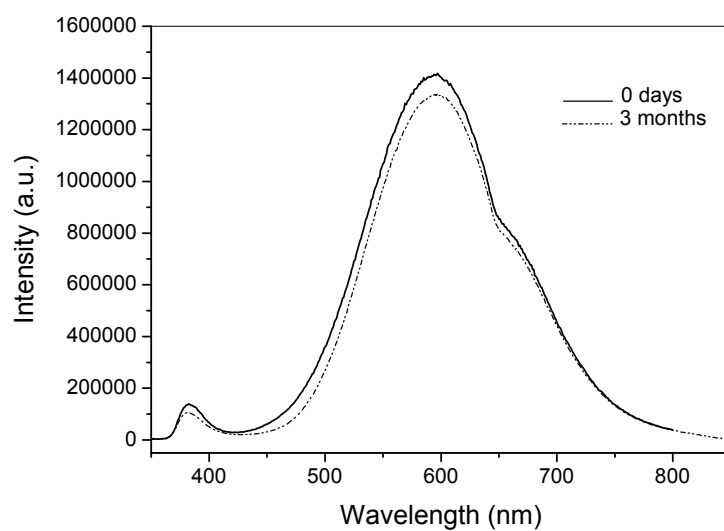

**Fig. S5** Room temperature solid-state PL spectra of ZnO-1 nanoparticles under UV excitation at 325 nm after being stored for 0 days (solid curve) and 3 months (dash curve) in air at room temperature.

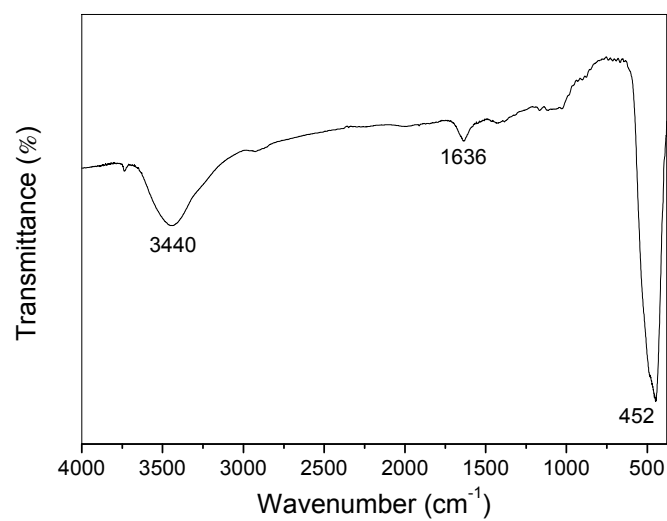

**Fig. S6** FTIR spectrum of ZnO-1 nanoparticles.

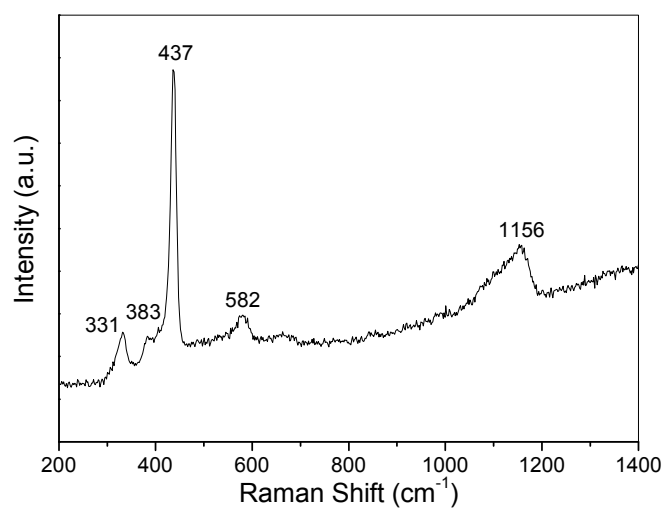

**Fig. S7** Raman spectrum of ZnO-1 nanoparticles.

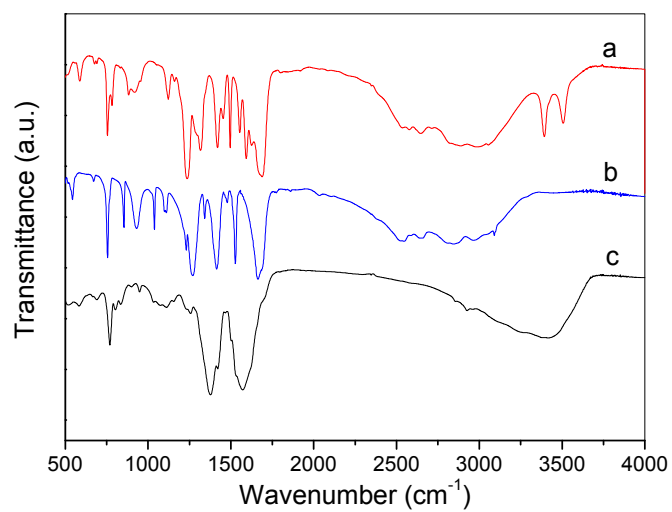

**Fig. S8** IR spectra of ligand A (a), ligand C (b) and precursor-2 (c).

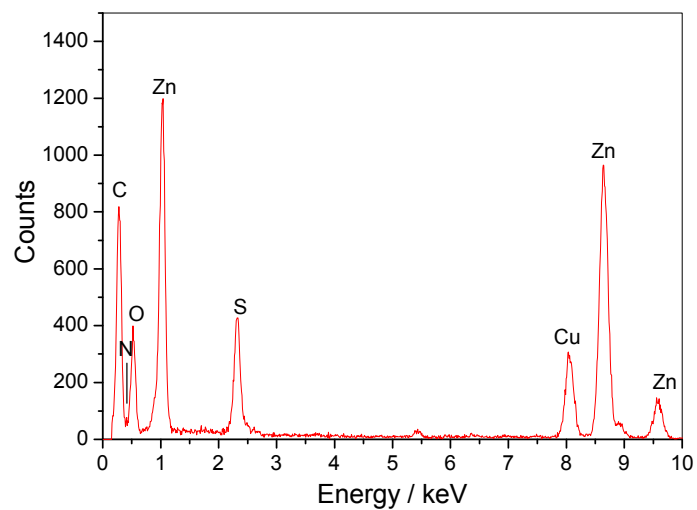

**Fig. S9** EDS spectrum of precursor-2. Cu peak came from the TEM grid.

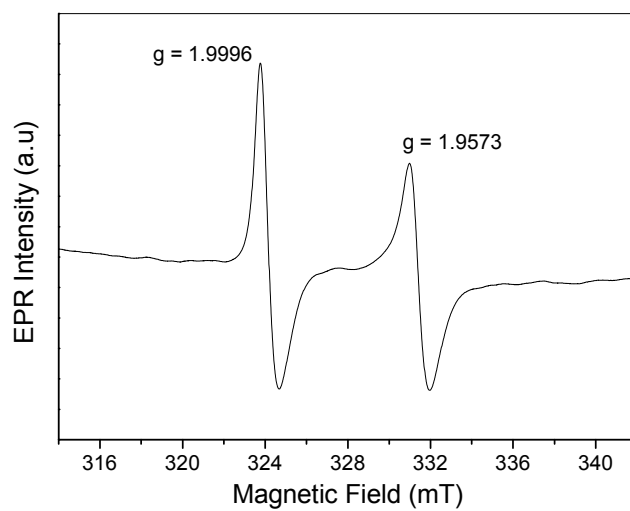

**Fig. S10** X-Band EPR spectrum of ZnO-2 nanostructures recorded at room temperature.
